# Supplementary material for: Differential sorting behavior for soluble and transmembrane cargoes at the trans-Golgi network in endocrine cells
Source: PubMed Central journal article supplement — Mol Biol Cell. 2020 Feb 1;31(3):157–66. doi: 10.1091/mbc.E19-10-0561 (PMC7001476; doi:10.1091/mbc.e19-10-0561), 2020-02-01
Supplement: mbc-31-157-s001.pdf [file mbc-31-157-s001.pdf]

# Supplemental Materials

*Molecular Biology of the Cell*

Hummer et al.

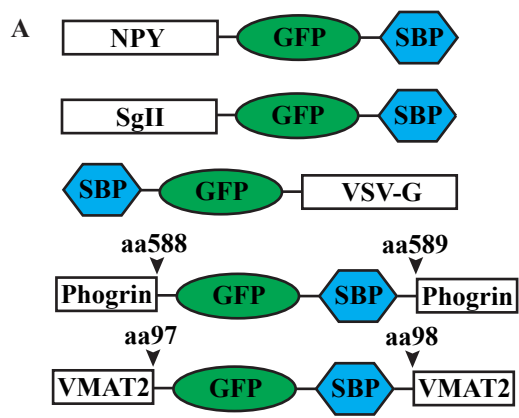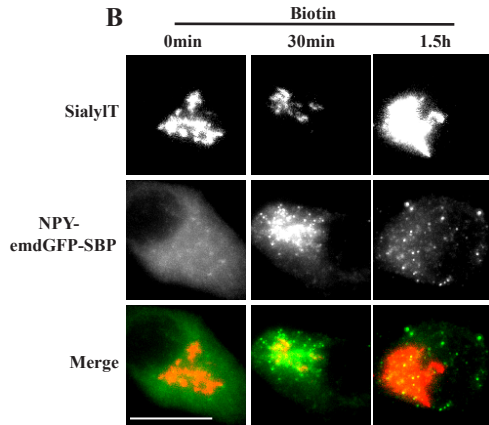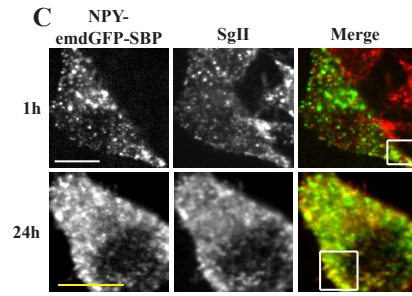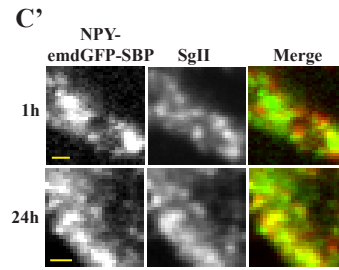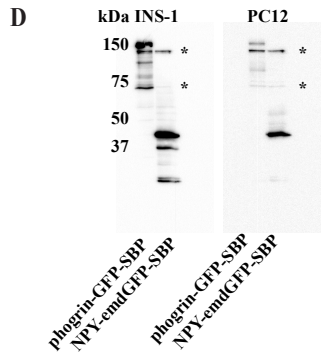

## Figure S1

(A) Diagrams depicting the insertion sites of GFP-SBP for the RUSH constructs used in this study. (B) PC12 cells transfected with NPY-*emdGFP-SBP* as in **Fig. 1**, incubated with biotin for the indicated times, fixed and imaged using a widefield epifluorescence microscope. (C) PC12 cells transfected with NPY-*emdGFP-SBP* and incubated with biotin for 1h (B) or 24h (C) and co-stained for SgII. Insets are shown in C'. (D) Western blot using lysates from INS-1 or PC12 cells transfected with phogrin-*emdGFP-SBP* or NPY-*emdGFP-SBP* as indicated. Asterisks indicate non-specific bands. Scale bar indicates 10  $\mu\text{m}$  and 1  $\mu\text{m}$  for insets.

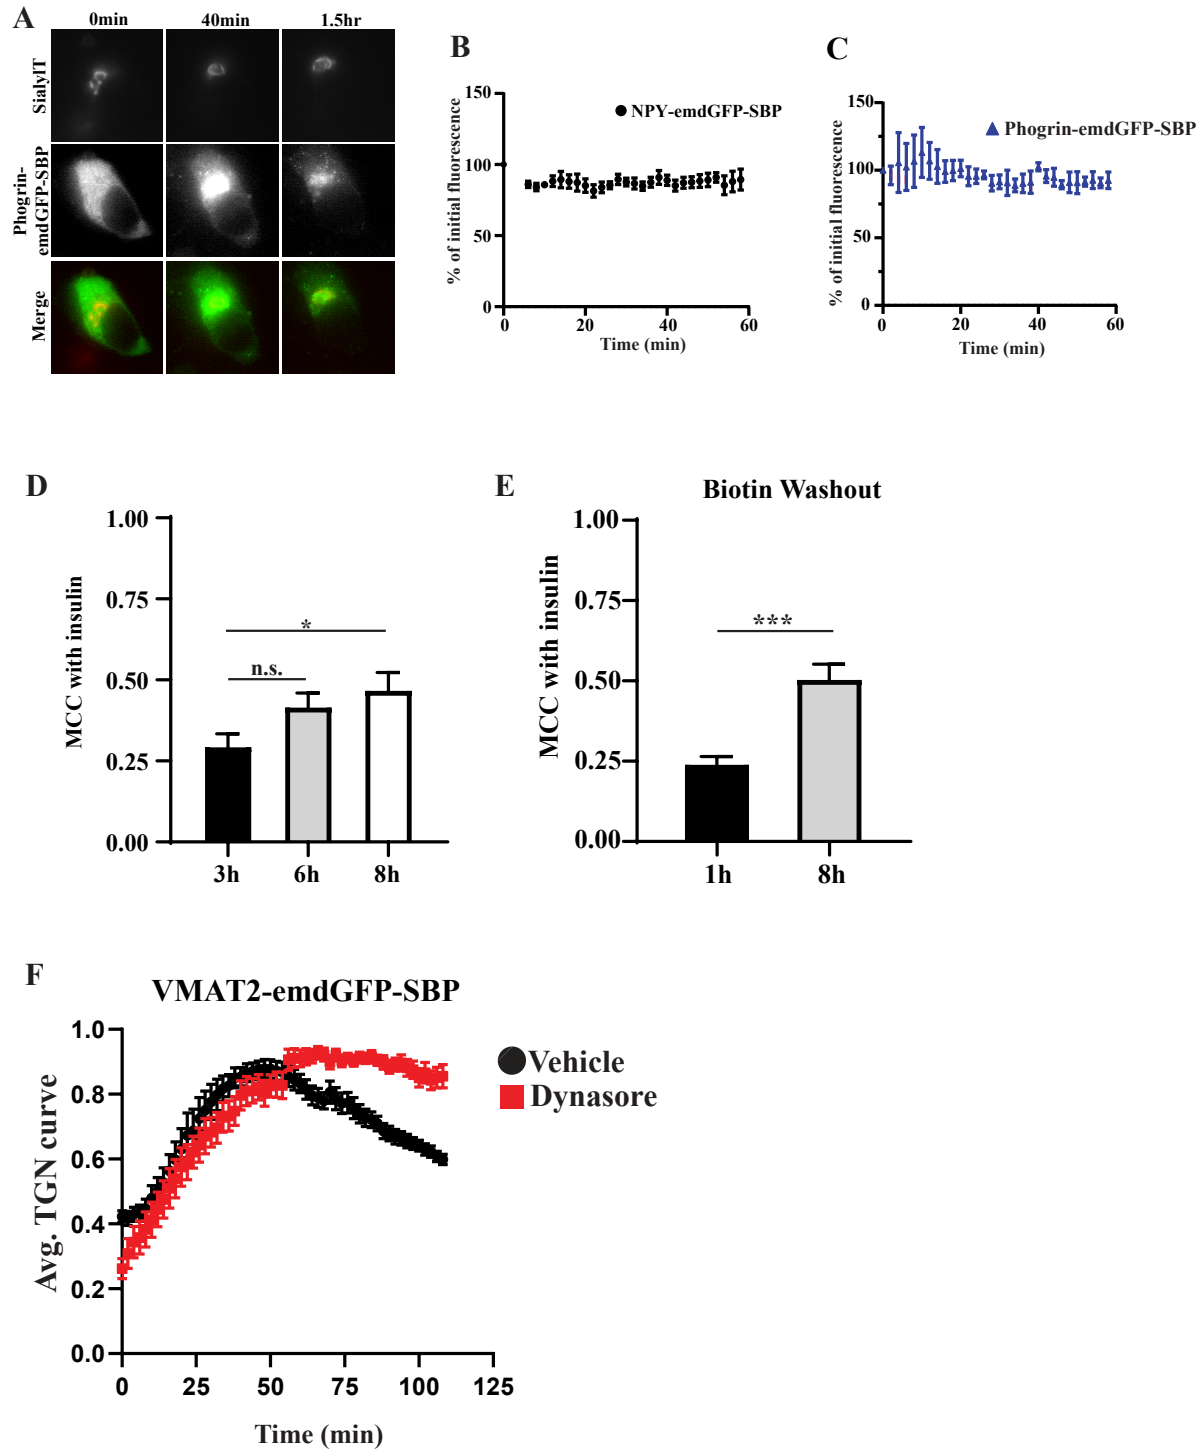

## Figure S2

(A) INS-1 cells were transfected with phogrin-*emdgfp*-SBP together with the TGN marker sialyltransferase-TagRFP657 and ER-hook, incubated with biotin for the indicated times, fixed and imaged using a widefield epifluorescence microscope. (B,C) INS-1 cells were co-transfected with indicated RUSH cargoes together with an ER-hook and imaged using an inverted widefield microscope. Cells not treated with biotin were imaged as in **Fig. 2** to measure photobleaching.  $n = 3$  cells for NPY-*emdgfp*-SBP and  $n = 2$  for phogrin-*emdgfp*-SBP. Data shown indicate mean  $\pm$  SEM. (D) INS-1 cells were transfected with phogrin-*emdgfp*-SBP and co-stained for insulin at the indicated times. The extent of colocalization with insulin was determined by Manders Correlation Coefficient (MCC) as in **Fig. 3**. \*\*\*\* $p < 0.0001$  by one-way ANOVA followed by posthoc Tukey t-test (3hr Biotin:  $n = 13$  cells, 6h biotin biotin:  $n = 12$  cells, 8h biotin:  $n = 8$  cells). (E) INS-1 cells were transfected as in **D**, incubated with biotin for 30min, and rinsed extensively. Cells were fixed and co-stained for insulin at 1h or 8h after the washout. The extent of colocalization was determined as in **D**. \*\*\* $p < 0.0001$  (1h biotin:  $n = 10$  cells, 8h biotin:  $n = 10$  cells). (F) INS-1 cells transfected with VMAT2-*emdgfp*-SBP were incubated with biotin in presence or absence of 80 $\mu$ M dynasore. Fluorescence within the TGN region was monitored as described in **Fig. 3**. Average curves of TGN fluorescence are shown. ( $n = 12$  and 4 cells from 2 independent transfections for VMAT2-*emdgfp*-SBP vehicle and dynasore, respectively). Data shown indicate mean  $\pm$  SEM.

### **Movie S1**

INS-1 cells transfected with sialyltransferase-TagRFP657 (red), NPY-emdGFP-SBP (green), or SgII-emdGFP-SBP (green), or phogrin-emdGFP-SBP (green), or VMAT2-emdGFP-SBP (green), or SBP-emdGFP-VSV-G (green) and ER hook. Movie shown are played at 15 frames per second. Scale bar indicates 10  $\mu\text{m}$ .

### **Movie S2**

INS-1 cells transfected with NPY-mCherry-SBP (red), sialyltransferase-TagRFP657 (blue), SgII-emdGFP-SBP (green), or phogrin-emdGFP-SBP (green), or SBP-emdGFP-VSV-G (green), and ER hook in presence or absence of dynasore as indicated. Movie shown is 2 min and played at 10 frames per second. Movie begins 40 min after biotin addition. Scale bar indicates 5  $\mu\text{m}$ .
